# Supplementary material for: Evaluation of Prognostic Factors of Severity in Acute Biliary Pancreatitis
Source: PubMed Central journal article supplement (PMC7352282; doi:10.3390/ijms21124300), 2020-06-16
Supplement: ijms-21-04300-s001.pdf [file ijms-21-04300-s001.pdf]

**Table S1:** Demographic and clinical characteristics of the five patients who died of severe acute biliary pancreatitis.

| Patient | Age | Gender | BMI  | Charlson Index | Hospital stay | time      | WBC   | NLR   | PLR    | SIRI  | CRP   | PCT   | Hepcidin | BISAP | SIRS | MMS |
|---------|-----|--------|------|----------------|---------------|-----------|-------|-------|--------|-------|-------|-------|----------|-------|------|-----|
| 1       | 89  | male   | 24.4 | 4              | 24            | admission | 22.03 | 25.78 | 210.39 | 4.87  | 417.1 | 9.94  | 158.6    | 2     | 1    | 3   |
|         |     |        |      |                |               | 48 h      | 17.78 | 24.28 | 199.18 | 8.98  | 415.5 | 9.23  | 231.1    | 5     | 2    | 4   |
| 2       | 68  | male   | 22.9 | 2              | 3             | admission | 22.13 | 8.73  | 127.31 | 5.66  | 5.0   | 0.49  | 284.6    | 1     | 1    | 2   |
|         |     |        |      |                |               | 48 h      | 3.96  | 6.43  | 360.87 | 1.09  | 446.8 | 16.28 | 161.1    | 5     | 4    | 4   |
| 3       | 92  | female | 21.2 | 4              | 3             | admission | 25.27 | 15.43 | 210.88 | 11.57 | 270.1 | 33.45 | 134.6    | 4     | 3    | 4   |
|         |     |        |      |                |               | 48 h      | 14.54 | 23.18 | 464.91 | 12.05 | 565.7 | 26.11 | 311.0    | 5     | 3    | 4   |
| 4       | 93  | male   | 28.3 | 4              | 10            | admission | 17.57 | 37.81 | 453.49 | 23.44 | 36.1  | 0.60  | 12.0     | 3     | 2    | 0   |
|         |     |        |      |                |               | 48 h      | 17.51 | 29.94 | 400.00 | 18.57 | 256.9 | 0.57  | 330.0    | 5     | 2    | 1   |
| 5       | 82  | female | 23.0 | 4              | 34            | admission | 15.12 | 17.25 | 437.97 | 9.32  | 10.3  | 0.56  | 246.5    | 3     | 2    | 1   |
|         |     |        |      |                |               | 48 h      | 19.00 | 15.47 | 245.05 | 8.20  | 337.9 | 3.09  | 411.4    | 4     | 3    | 2   |

BMI: body mass index; WBC: white blood count; NLR: neutrophil-lymphocyte ratio; PLR: platelet-lymphocyte ratio; SIRI: Systemic Inflammatory Response Index ; CRP: C-reactive protein ; PCT: procalcitonin; BISAP: Bedside index for severity in acute pancreatitis; SIRS: Systemic Inflammatory Response Syndrome ; MMS: Marshall modified score
